# Supplementary material for: An ethanethioate functionalized polythiophene as an optical probe for sensitive and fast detection of water content in organic solvents
Source: Royal Society of Chemistry journal article supplement (doi:10.1039/d1ay00967b), 2021-01-01
Supplement: d1ay00967b1.pdf [file d1ay00967b1.pdf]

## Supporting Information

**Table S1** Comparison of previously reported fluorescence water probe with our probe

**PTS**

| Entry | Solvent      | LOD (v/v %)        | Sensing strategy                                       | Ref.      |
|-------|--------------|--------------------|--------------------------------------------------------|-----------|
| 1     | THF          | 0.059              | ICT                                                    | 12        |
|       | DMF          | 0.210              |                                                        |           |
|       | ethanol      | 0.081              |                                                        |           |
|       | acetonitrile | 0.092              |                                                        |           |
|       | acetone      | 0.400              |                                                        |           |
| 2     | DMF          | 0.011              | Chemical reaction                                      | 13        |
|       | MeOH         | 0.007              |                                                        |           |
|       | acetonitrile | 0.007              |                                                        |           |
|       | DMSO         | 0.008              |                                                        |           |
| 3     | THF          | 0.13               | ICT                                                    | 14        |
|       | DMF          | 0.088              |                                                        |           |
|       | 1,4-dioxane  | 0.025              |                                                        |           |
|       | acetone      | 0.019              |                                                        |           |
|       | acetonitrile | 0.024              |                                                        |           |
|       | DMSO         | 0.095              |                                                        |           |
| 4     | THF          | 0.058 <sup>a</sup> | FRET                                                   | 15        |
|       | DMF          | 0.026 <sup>a</sup> |                                                        |           |
|       | acetone      | 0.076 <sup>a</sup> |                                                        |           |
|       | acetonitrile | 0.063 <sup>a</sup> |                                                        |           |
| 5     | THF          | 0.28               | Chemical reaction                                      | 16        |
|       | acetonitrile | 0.20               |                                                        |           |
| 6     | THF          | 0.1 <sup>a</sup>   | PET                                                    | 17        |
|       | 1,4-dioxane  | 0.1 <sup>a</sup>   |                                                        |           |
|       | acetonitrile | 0.001 <sup>a</sup> |                                                        |           |
|       | ethanol      | 0.001 <sup>a</sup> |                                                        |           |
| 7     | THF          | 0.020              | ICT                                                    | 18        |
|       | DMF          | 0.054              |                                                        |           |
|       | 1,4-dioxane  | 0.049              |                                                        |           |
|       | acetone      | 0.016              |                                                        |           |
|       | acetonitrile | 0.021              |                                                        |           |
|       | methanol     | 0.291              |                                                        |           |
| 8     | THF          | 0.0464             | Chemical reaction                                      | 19        |
|       | acetonitrile | 0.0298             |                                                        |           |
|       | methanol     | 0.0017             |                                                        |           |
| 9     | THF          | 0.98               | Hydrogen-bond interactions                             | 20        |
|       | acetonitrile | 0.038              |                                                        |           |
|       | acetone      | 0.74               |                                                        |           |
|       | DMSO         | 1.1                |                                                        |           |
|       | methanol     | 1.3                |                                                        |           |
| 10    | DMF          | 0.008 <sup>a</sup> | Water induced interpolymer $\pi$ -stacking aggregation | 21        |
|       | ethanol      | 0.1 <sup>a</sup>   |                                                        |           |
|       | acetonitrile | 0.02 <sup>a</sup>  |                                                        |           |
|       | NMP          | 0.009 <sup>a</sup> |                                                        |           |
| 11    | THF          | 0.034              | Water induced interpolymer $\pi$ -stacking aggregation | This work |
|       | DMF          | 0.013              |                                                        |           |
|       | DMAc         | 0.014              |                                                        |           |

<sup>a</sup> Results expressed using weight/weight percent (wt%).

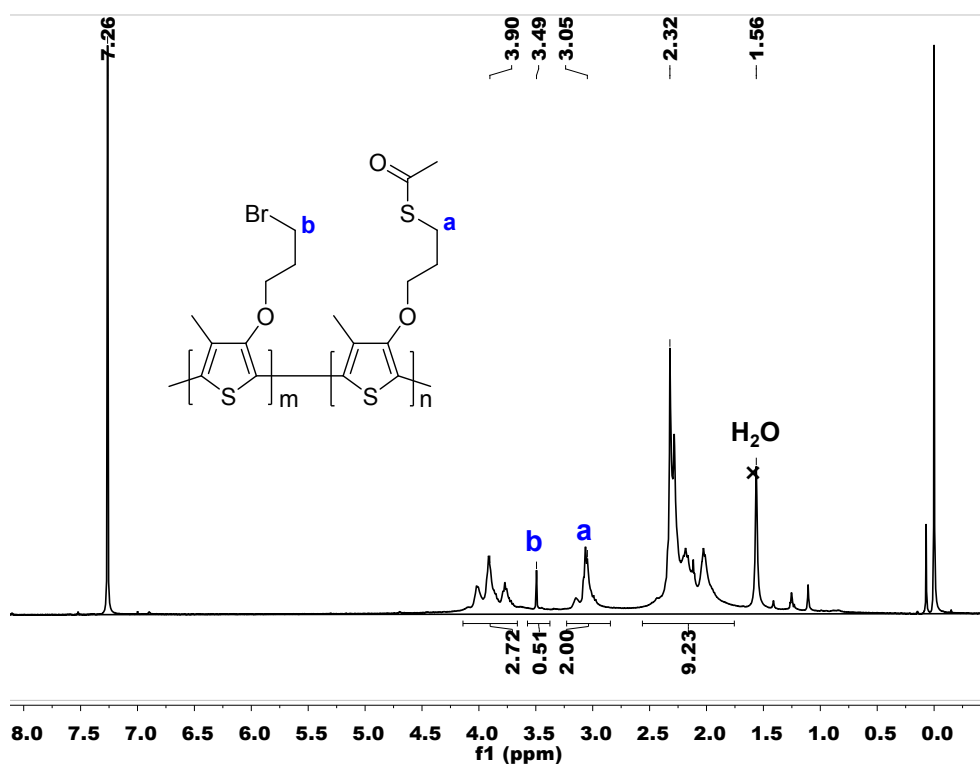

**Fig. S1**  $^1\text{H}$  NMR spectrum of polymer probe **PTS**. The ethanethioated graft yield was determined by the integral ratio of the proton signal at 3.05 ppm (a) to that at 3.49 ppm (b).

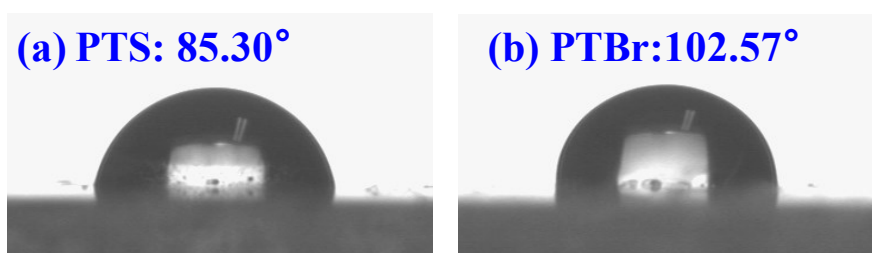

**Fig. S2** Contact angles for (a) **PTS** and (b) **PTBr**.

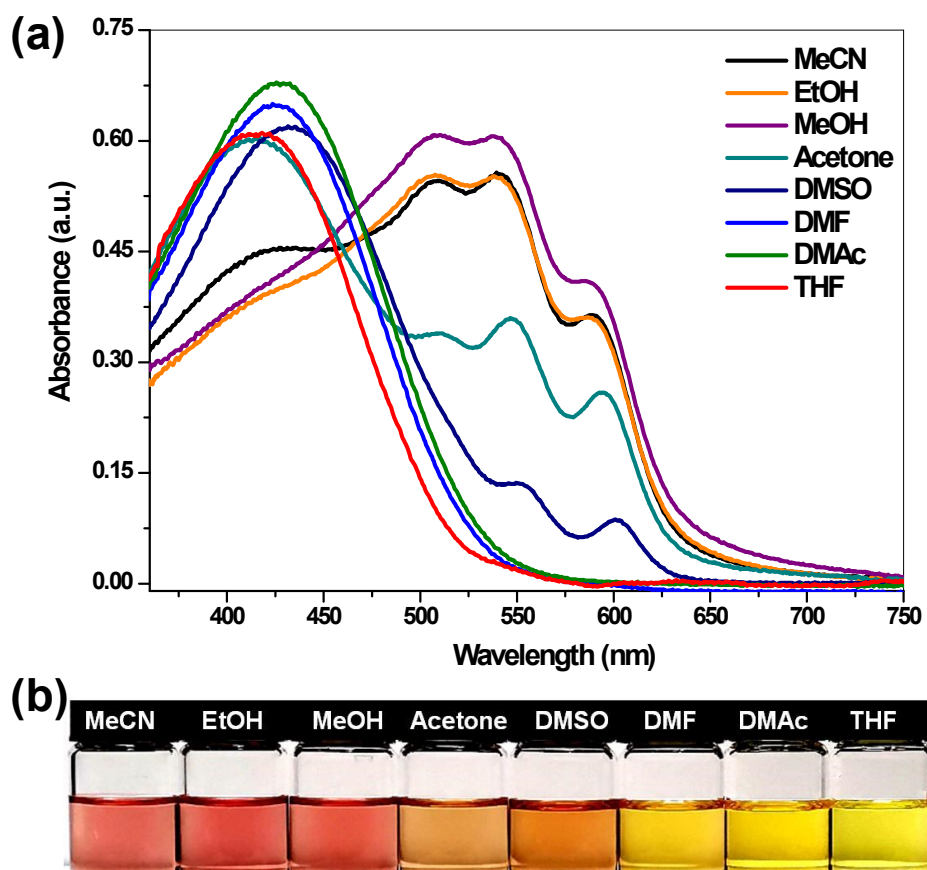

**Fig. S3** (a) UV-Vis absorption spectra of **PTS** in different organic solvents,  $[\text{PTS}] = 100 \mu\text{M}$ . (b) Photographs of **PTS** in various organic solvents.

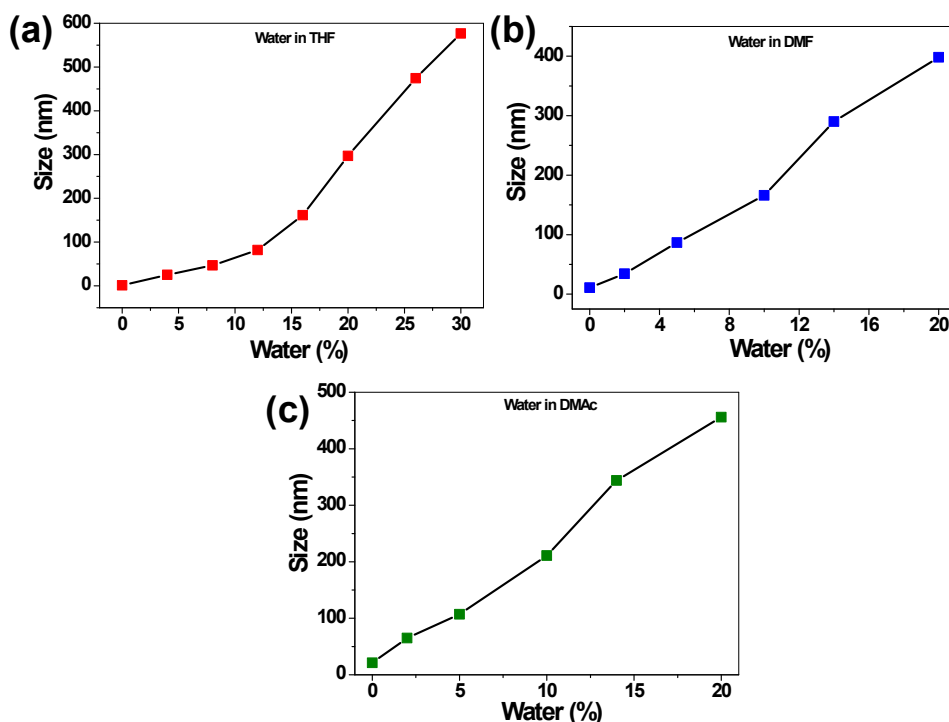

**Fig. S4** Changes in the average hydrodynamic diameter of PTS aggregates as water content in various solvents: (a) THF, (b) DMF and (c) DMAc obtained by DLS analysis.

**Table S2** Calculation equations, detection range and limit of detection (LOD) of the probe PTS for determination of water content in organic solvents

| Solvents | Calculation equations <sup>a</sup> | Correlation coefficient ( $R^2$ ) | Detection range (v/v) | Limit of detection (LOD) |
|----------|------------------------------------|-----------------------------------|-----------------------|--------------------------|
| THF      | $F/F_0 = 1.0027 - 0.0339C$         | 0.9985                            | 0-30 %                | 0.034 %                  |
| DMF      | $F/F_0 = 1.01094 - 0.08556C$       | 0.9985                            | 0-10 %                | 0.013 %                  |
| DMAc     | $F/F_0 = 1.01544 - 0.08182C$       | 0.9970                            | 0-10 %                | 0.014 %                  |

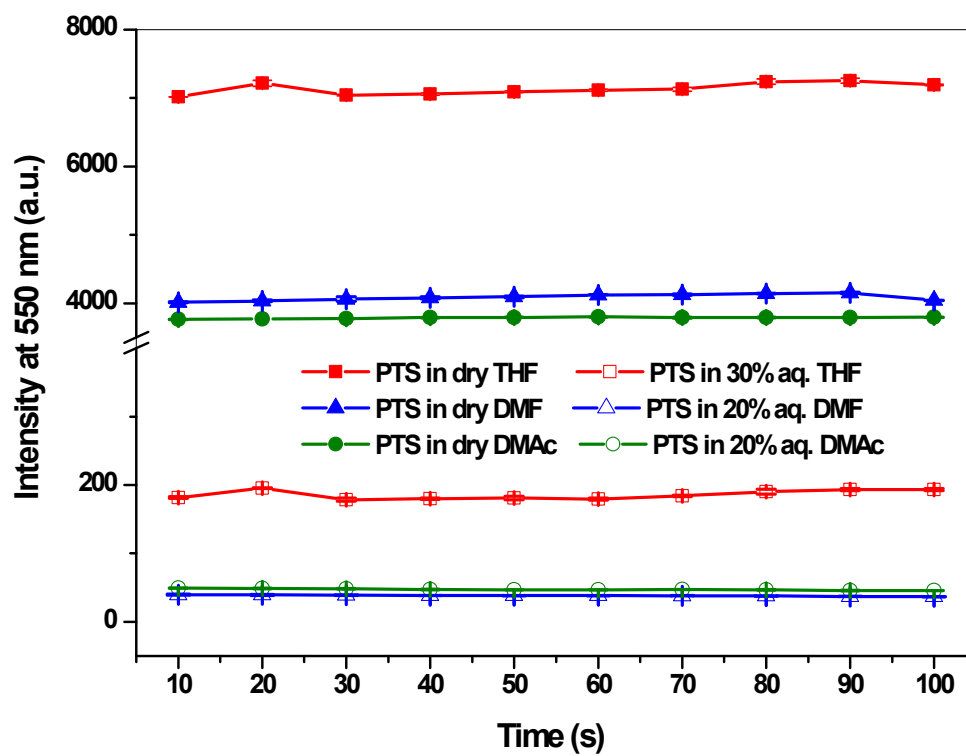

**Fig. S5** Photostability of PTS (100  $\mu$ M) in dry THF, DMF, DMAc and their corresponding aqueous solutions. Error bars represent the standard deviations of three independent experiments.

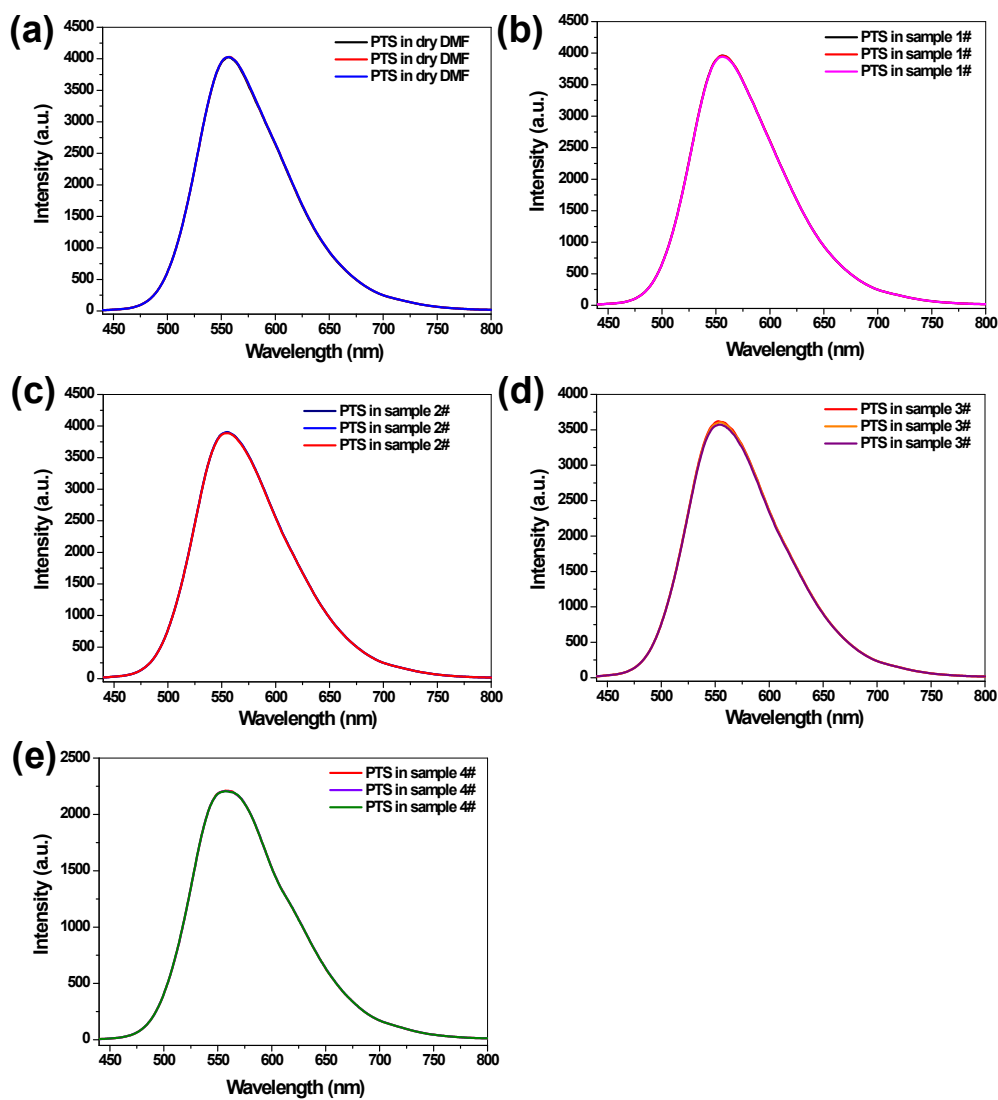

**Fig. S6** Photoluminescence spectra of PTS in (a) dry DMF, and (b-e) aqueous DMF. The water contents given of b-e are 0.3% (v/v), 0.4% (v/v), 1.3% (v/v) and 5.3% (v/v), respectively. [PTS] = 100  $\mu$ M, excitation at 420 nm.

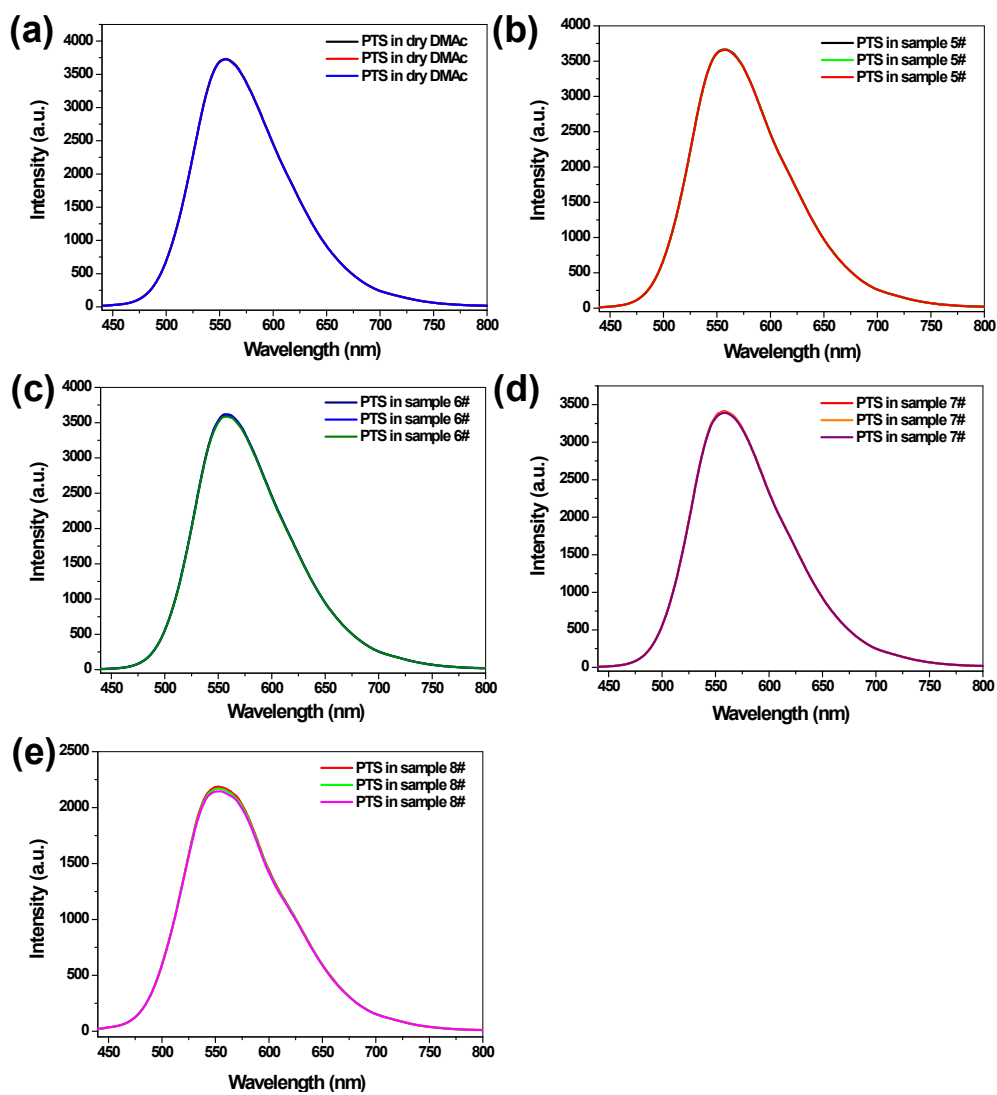

**Fig. S7** Photoluminescence spectra of **PTS** in (a) dry DMAc, and (b-e) aqueous DMAc. The water contents given of b-e are 0.2% (v/v), 0.3% (v/v), 1.2% (v/v) and 5.2% (v/v), respectively. [PTS] = 100  $\mu$ M, excitation at 420 nm.
